# Supplementary material for: Eradicating the large white butterfly from New Zealand eliminates a threat to endemic Brassicaceae
Source: PubMed Central journal article supplement (PMC7410255; doi:10.1371/journal.pone.0236791), 2020-08-06

# PLOS ONE

## Eradicating large white butterfly from New Zealand eliminates a threat to endemic Brassicaceae --Manuscript Draft--

|                                                                                                                                                                                                                                                               |                                                                                                                                                                                                                                                                                                                                                                                                                                                                                                                                                                                                                                                                                                                                                                                                                                                                                                                                                                                                                                                                                                                                                                                                                                                                                                                                                                                                                                                                                                                                                                                                                                                          |
|---------------------------------------------------------------------------------------------------------------------------------------------------------------------------------------------------------------------------------------------------------------|----------------------------------------------------------------------------------------------------------------------------------------------------------------------------------------------------------------------------------------------------------------------------------------------------------------------------------------------------------------------------------------------------------------------------------------------------------------------------------------------------------------------------------------------------------------------------------------------------------------------------------------------------------------------------------------------------------------------------------------------------------------------------------------------------------------------------------------------------------------------------------------------------------------------------------------------------------------------------------------------------------------------------------------------------------------------------------------------------------------------------------------------------------------------------------------------------------------------------------------------------------------------------------------------------------------------------------------------------------------------------------------------------------------------------------------------------------------------------------------------------------------------------------------------------------------------------------------------------------------------------------------------------------|
| <b>Manuscript Number:</b>                                                                                                                                                                                                                                     | PONE-D-19-32860                                                                                                                                                                                                                                                                                                                                                                                                                                                                                                                                                                                                                                                                                                                                                                                                                                                                                                                                                                                                                                                                                                                                                                                                                                                                                                                                                                                                                                                                                                                                                                                                                                          |
| <b>Article Type:</b>                                                                                                                                                                                                                                          | Research Article                                                                                                                                                                                                                                                                                                                                                                                                                                                                                                                                                                                                                                                                                                                                                                                                                                                                                                                                                                                                                                                                                                                                                                                                                                                                                                                                                                                                                                                                                                                                                                                                                                         |
| <b>Full Title:</b>                                                                                                                                                                                                                                            | Eradicating large white butterfly from New Zealand eliminates a threat to endemic Brassicaceae                                                                                                                                                                                                                                                                                                                                                                                                                                                                                                                                                                                                                                                                                                                                                                                                                                                                                                                                                                                                                                                                                                                                                                                                                                                                                                                                                                                                                                                                                                                                                           |
| <b>Short Title:</b>                                                                                                                                                                                                                                           | Insect eradication to help protect threatened endemic plants                                                                                                                                                                                                                                                                                                                                                                                                                                                                                                                                                                                                                                                                                                                                                                                                                                                                                                                                                                                                                                                                                                                                                                                                                                                                                                                                                                                                                                                                                                                                                                                             |
| <b>Corresponding Author:</b>                                                                                                                                                                                                                                  | Craig Phillips, PhD<br>AgResearch Ltd<br>Lincoln, Canterbury NEW ZEALAND                                                                                                                                                                                                                                                                                                                                                                                                                                                                                                                                                                                                                                                                                                                                                                                                                                                                                                                                                                                                                                                                                                                                                                                                                                                                                                                                                                                                                                                                                                                                                                                 |
| <b>Keywords:</b>                                                                                                                                                                                                                                              | invasion; invasive; non-native; alien; pest; insect; biodiversity threat; biodiversity conservation; environmental impact; native plant; endemic plant; Urban; community engagement; public awareness; social license; sightings; host plant destruction; biological control; chemical control; lure                                                                                                                                                                                                                                                                                                                                                                                                                                                                                                                                                                                                                                                                                                                                                                                                                                                                                                                                                                                                                                                                                                                                                                                                                                                                                                                                                     |
| <b>Abstract:</b>                                                                                                                                                                                                                                              | In May 2010 the large white butterfly, <i>Pieris brassicae</i> L. (Lepidoptera: Pieridae), was discovered to have established in New Zealand. It is a Palearctic species that—due to its wide host plant range within the Brassicaceae—was regarded as a risk to New Zealand’s native brassicas. New Zealand has 86 native species of Brassicaceae including 81 that are endemic, and many are threatened by both habitat loss and herbivory by other organisms. Initially a program was implemented to slow its spread, then an eradication attempt commenced in November 2012. The <i>P. brassicae</i> population was distributed over an area of approximately 100 km <sup>2</sup> primarily in urban residential gardens. The eradication attempt involved promoting public engagement and reports of sightings, including offering a bounty for a two week period, systematically searching gardens for <i>P. brassicae</i> and its host plants, removing host plants, spraying insecticide to kill eggs and larvae, searching for pupae, capturing adults with nets, and augmenting natural enemy populations. The attempt was supported by research that helped to progressively refine the eradication strategy and evaluate its performance. The last New Zealand detection of <i>P. brassicae</i> occurred on 16 December 2014, the eradication program ceased on 4 June 2016 and <i>P. brassicae</i> was officially declared eradicated from New Zealand on 22 November 2016, 6.5 years after it was first detected and 4 years after the eradication attempt commenced. This is the first species of butterfly ever to have been eradicated. |
| <b>Order of Authors:</b>                                                                                                                                                                                                                                      | Craig B. Phillips, PhD<br>Kerry Brown<br>Chris Green<br>Richard Toft<br>Graham Walker<br>Keith Broome                                                                                                                                                                                                                                                                                                                                                                                                                                                                                                                                                                                                                                                                                                                                                                                                                                                                                                                                                                                                                                                                                                                                                                                                                                                                                                                                                                                                                                                                                                                                                    |
| <b>Additional Information:</b>                                                                                                                                                                                                                                |                                                                                                                                                                                                                                                                                                                                                                                                                                                                                                                                                                                                                                                                                                                                                                                                                                                                                                                                                                                                                                                                                                                                                                                                                                                                                                                                                                                                                                                                                                                                                                                                                                                          |
| <b>Question</b>                                                                                                                                                                                                                                               | <b>Response</b>                                                                                                                                                                                                                                                                                                                                                                                                                                                                                                                                                                                                                                                                                                                                                                                                                                                                                                                                                                                                                                                                                                                                                                                                                                                                                                                                                                                                                                                                                                                                                                                                                                          |
| <b>Financial Disclosure</b><br><br>Enter a financial disclosure statement that describes the sources of funding for the work included in this submission. Review the <a href="#">submission guidelines</a> for detailed requirements. View published research | Details of all costs are publicly available on-line in the Department of Conservation’s 2015-16 <i>Pieris brassicae</i> eradication program annual report: <a href="http://www.doc.govt.nz/about-us/science-publications/conservation-publications/threats-and-impacts/animal-pests/pieris-brassicaceae-great-white-butterfly-eradication-annual-report/">www.doc.govt.nz/about-us/science-publications/conservation-publications/threats-and-impacts/animal-pests/pieris-brassicaceae-great-white-butterfly-eradication-annual-report/</a><br>Operational aspects of the eradication program were funded by the New Zealand Department of Conservation (DOC; <a href="http://www.doc.govt.nz">www.doc.govt.nz</a> ). Vegetables New Zealand ( <a href="http://www.freshvegetables.co.nz">www.freshvegetables.co.nz</a> ) contributed some funds to DOC to support operational                                                                                                                                                                                                                                                                                                                                                                                                                                                                                                                                                                                                                                                                                                                                                                           |

articles from [PLOS ONE](#) for specific examples.

This statement is required for submission and **will appear in the published article** if the submission is accepted. Please make sure it is accurate.

#### Unfunded studies

Enter: *The author(s) received no specific funding for this work.*

#### Funded studies

Enter a statement with the following details:

- Initials of the authors who received each award
- Grant numbers awarded to each author
- The full name of each funder
- URL of each funder website
- Did the sponsors or funders play any role in the study design, data collection and analysis, decision to publish, or preparation of the manuscript?
- **NO** - Include this sentence at the end of your statement: *The funders had no role in study design, data collection and analysis, decision to publish, or preparation of the manuscript.*
- **YES** - Specify the role(s) played.

\* typeset

#### Competing Interests

Use the instructions below to enter a competing interest statement for this submission. On behalf of all authors, disclose any [competing interests](#) that could be perceived to bias this work—acknowledging all financial support and any other relevant financial or non-financial competing interests.

This statement **will appear in the published article** if the submission is accepted. Please make sure it is accurate. View published research articles from [PLOS ONE](#) for specific examples.

aspects of the eradication program.

KB CG, and KB are full time employees of DOC, which fully supported their research contributions. DOC also partly supported the research contributions of RT, who is a private consulting entomologist ([www.entecol.co.nz](http://www.entecol.co.nz)).

The New Zealand government research institutes AgResearch ([www.agresearch.co.nz](http://www.agresearch.co.nz)) and Plant and Food Research ([www.plantandfood.co.nz](http://www.plantandfood.co.nz)) are partners in a New Zealand research collaboration called Better Border Biosecurity ([www.b3nz.org](http://www.b3nz.org)). The collaboration aims to help reduce the rate at which non-native insects, weeds and diseases that could harm valued New Zealand plants are becoming established in New Zealand. CP is an employee of AgResearch and GW of Plant and Food Research, and their research contributions to the eradication programme were funded largely via their employers' contributions to the Better Border Biosecurity collaboration.

The New Zealand Ministry for Primary Industries ([www.mpi.govt.nz](http://www.mpi.govt.nz)) also provided financial support for some of the research costs of CP, GW and RT, and the New Zealand TR Ellet Agricultural Trust contributed support for some of the research costs of CP.

The authors have declared that no competing interests exist.

### NO authors have competing interests

Enter: *The authors have declared that no competing interests exist.*

### Authors with competing interests

Enter competing interest details beginning with this statement:

*I have read the journal's policy and the authors of this manuscript have the following competing interests: [insert competing interests here]*

\* typeset

### Ethics Statement

Enter an ethics statement for this submission. This statement is required if the study involved:

- Human participants
- Human specimens or tissue
- Vertebrate animals or cephalopods
- Vertebrate embryos or tissues
- Field research

Write "N/A" if the submission does not require an ethics statement.

General guidance is provided below.

Consult the [submission guidelines](#) for detailed instructions. **Make sure that all information entered here is included in the Methods section of the manuscript.**

All work described in this manuscript that involved human subjects was conducted with strict adherence to legislation described in the New Zealand Biosecurity Act 1993 (<http://www.legislation.govt.nz/act/public/1993/0095/latest/DLM314623.html>). The data were collected by staff from the New Zealand Department of Conservation and Ministry for Primary Industries who were authorised to do so under the New Zealand Biosecurity Act 1993. *Pieris brassicae* is legislated as an unwanted organism under this Act, which means authorised persons have a wide range of statutory powers to enable them to control it; including accessing, inspecting and applying treatments on privately owned properties.

**Format for specific study types**

**Human Subject Research (involving human participants and/or tissue)**

- Give the name of the institutional review board or ethics committee that approved the study
- Include the approval number and/or a statement indicating approval of this research
- Indicate the form of consent obtained (written/oral) or the reason that consent was not obtained (e.g. the data were analyzed anonymously)

**Animal Research (involving vertebrate animals, embryos or tissues)**

- Provide the name of the Institutional Animal Care and Use Committee (IACUC) or other relevant ethics board that reviewed the study protocol, and indicate whether they approved this research or granted a formal waiver of ethical approval
- Include an approval number if one was obtained
- If the study involved *non-human primates*, add *additional details* about animal welfare and steps taken to ameliorate suffering
- If anesthesia, euthanasia, or any kind of animal sacrifice is part of the study, include briefly which substances and/or methods were applied

**Field Research**

Include the following details if this study involves the collection of plant, animal, or other materials from a natural setting:

- Field permit number
- Name of the institution or relevant body that granted permission

**Data Availability**

Authors are required to make all data underlying the findings described fully available, without restriction, and from the time of publication. PLOS allows rare exceptions to address legal and ethical concerns. See the [PLOS Data Policy](#) and [FAQ](#) for detailed information.

No - some restrictions will apply

A Data Availability Statement describing where the data can be found is required at submission. Your answers to this question constitute the Data Availability Statement and **will be published in the article**, if accepted.

**Important:** Stating 'data available on request from the author' is not sufficient. If your data are only available upon request, select 'No' for the first question and explain your exceptional situation in the text box.

Do the authors confirm that all data underlying the findings described in their manuscript are fully available without restriction?

**Describe where the data may be found in full sentences. If you are copying our sample text, replace any instances of XXX with the appropriate details.**

- If the data are **held or will be held in a public repository**, include URLs, accession numbers or DOIs. If this information will only be available after acceptance, indicate this by ticking the box below. For example: *All XXX files are available from the XXX database (accession number(s) XXX, XXX).*
- If the data are all contained **within the manuscript and/or Supporting Information files**, enter the following: *All relevant data are within the manuscript and its Supporting Information files.*
- If neither of these applies but you are able to provide **details of access elsewhere**, with or without limitations, please do so. For example:

*Data cannot be shared publicly because of [XXX]. Data are available from the XXX Institutional Data Access / Ethics Committee (contact via XXX) for researchers who meet the criteria for access to confidential data.*

*The data underlying the results presented in the study are available from (include the name of the third party*

All relevant data are within the manuscript and its Supporting Information files.

|                                                                                                                                                                                                                                         |                                                                                                                                     |
|-----------------------------------------------------------------------------------------------------------------------------------------------------------------------------------------------------------------------------------------|-------------------------------------------------------------------------------------------------------------------------------------|
| <p><i>and contact information or URL).</i></p> <ul style="list-style-type: none"><li>• This text is appropriate if the data are owned by a third party and authors do not have permission to share the data.</li></ul> <p>* typeset</p> |                                                                                                                                     |
| Additional data availability information:                                                                                                                                                                                               | Tick here if your circumstances are not covered by the questions above and you need the journal's help to make your data available. |

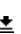

1 Eradicating large white butterfly from New Zealand eliminates a threat to  
2 endemic Brassicaceae

3

4 Craig B. Phillips <sup>a,b,\*</sup>, Kerry Brown <sup>c</sup>, Chris Green <sup>c</sup>, Richard Toft <sup>d</sup>, Graham Walker  
5 <sup>b,e</sup>, Keith Broome <sup>c</sup>

6 <sup>a</sup> AgResearch, Private Bag 4749, Christchurch 8140, New Zealand

7 <sup>b</sup> Better Border Biosecurity research collaboration, [www.b3nz.org](http://www.b3nz.org)

8 <sup>c</sup> Department of Conservation, PO Box 10-420, Wellington 6143, New Zealand

9 <sup>d</sup> Entecol Ltd, PO Box 2256, Stoke, Nelson 7041, New Zealand

10 <sup>e</sup> Plant & Food Research, Private Bag 92169, Auckland 1142, New Zealand

11

12 \* Corresponding author at: AgResearch, Private Bag 4749, Christchurch 8140, New  
13 Zealand. Email address: [craig.phillips@agresearch.co.nz](mailto:craig.phillips@agresearch.co.nz)

14 **Abstract**

15 In May 2010 the large white butterfly, *Pieris brassicae* L. (Lepidoptera: Pieridae),  
16 was discovered to have established in New Zealand. It is a Palearctic species that—  
17 due to its wide host plant range within the Brassicaceae—was regarded as a risk to  
18 New Zealand’s native brassicas. New Zealand has 86 native species of  
19 Brassicaceae including 81 that are endemic, and many are threatened by both  
20 habitat loss and herbivory by other organisms. Initially a program was implemented  
21 to slow its spread, then an eradication attempt commenced in November 2012. The  
22 *P. brassicae* population was distributed over an area of approximately 100 km<sup>2</sup>  
23 primarily in urban residential gardens. The eradication attempt involved promoting  
24 public engagement and reports of sightings, including offering a bounty for a two  
25 week period, systematically searching gardens for *P. brassicae* and its host plants,  
26 removing host plants, spraying insecticide to kill eggs and larvae, searching for  
27 pupae, capturing adults with nets, and augmenting natural enemy populations. The  
28 attempt was supported by research that helped to progressively refine the  
29 eradication strategy and evaluate its performance. The last New Zealand detection  
30 of *P. brassicae* occurred on 16 December 2014, the eradication program ceased on  
31 4 June 2016 and *P. brassicae* was officially declared eradicated from New Zealand  
32 on 22 November 2016, 6.5 years after it was first detected and 4 years after the  
33 eradication attempt commenced. This is the first species of butterfly ever to have  
34 been eradicated.

35

36 **Keywords:** invasive; non-native; alien; pest; impact; endemic plant; threat; urban;  
37 public awareness; sightings

38



## 39 1. Introduction

40 Unintentional introductions of nonnative species, including arthropods, are  
41 contributing to declining global biodiversity (Cicconardi et al., 2017; Vitousek et al.,  
42 1997; Wardle et al., 2011). Eradicating destructive nonnative species is challenging,  
43 but when successful can provide substantial benefits (Jones et al., 2016; Myers et  
44 al., 1998). The first organised attempt to eradicate a nonnative arthropod probably  
45 began in 1890 against the gypsy moth, *Lymantria dispar*, in the USA (Liebhold et al.,  
46 2016). Subsequently over 1200 programs in about 100 countries have attempted to  
47 eradicate at least 138 insect species (Kean et al., 2019). About 285 attempts (24%)  
48 have targeted 27 Lepidoptera species, which have all been moths rather than  
49 butterflies (Kean et al., 2019).

50 In May 2010, the Palaearctic large white butterfly, *Pieris brassicae* L.  
51 (Lepidoptera: Pieridae), was detected for the first time in New Zealand in Nelson  
52 (Fig. 1; Richardson and Voice, 2010). It had previously been accidentally introduced  
53 to South Africa (Geertsema, 1996) and Chile (Gardiner, 1974), and may have  
54 reached Nelson via its seaport as pupae on imported shipping containers, which is a  
55 known pathway for *P. brassicae* (Anonymous, 2002; Molet, 2011).

56 All of *P. brassicae*'s many host plants are brassicas (Brassicaceae) (Feltwell,  
57 1982). Each female lays about 500 eggs, which are laid on host plants in batches of  
58 50–150 eggs (Gardiner, 1963). Larvae feed gregariously and may defoliate several  
59 plants during their development. Fifth instar larvae crawl away from their host plants  
60 to pupate, typically on vertical surfaces in sheltered locations (Feltwell, 1982).

61 New Zealand has 86 native brassica species, of which 81 are endemic. Fifty  
62 seven have received threat classifications under a New Zealand system that was  
63 adapted from the International Union for Conservation of Nature Red List (Townsend  
64 et al., 2008): Twenty seven New Zealand brassicas are listed as Nationally Critical;  
65 eight are Nationally Endangered; six are Nationally Vulnerable; two are Declining;  
66 and 12 are Naturally Uncommon (de Lange et al., 2018). A further two species are  
67 presumed extinct, and ten are presumed threatened but are too data deficient to  
68 rank (S. Courtney, DOC, pers. comm. 2018). Many occur in small isolated  
69 populations that are expensive to protect and vulnerable to various threats, including  
70 herbivory by the closely related butterfly *P. rapae*; this species was accidentally  
71 introduced to New Zealand in 1930 (Hasenbank et al., 2011). *Pieris brassicae* also  
72 posed a risk to cultivated brassicas in New Zealand.

73 The Ministry for Primary Industries (MPI) is New Zealand's lead biosecurity  
74 agency with responsibilities to protect New Zealand's environment, economy, health  
75 and socio-cultural values under the Biosecurity Act 1993. MPI responded to *P.*  
76 *brassicae* by alerting the public, establishing a monitoring program to slow its spread  
77 and evaluating an eradication attempt. *Pieris brassicae* adults migrate long distances  
78 in Europe (Spieth and Cordes, 2012), which suggested it could spread quickly in  
79 New Zealand, and this impression was reinforced by *P. rapae* which took just 5–8  
80 years to spread throughout New Zealand (Muggeridge, 1942). Surprisingly, however,  
81 *P. brassicae* still appeared to be restricted to Nelson 2 years after it was first  
82 recorded there (Philip, 2012). Nevertheless, MPI terminated its response in  
83 November 2012 because it considered an eradication attempt would probably fail  
84 and the expected benefit to cost ratio was too small (Brown et al., 2019).

85 New Zealand's Department of Conservation (DOC) is responsible for protecting  
86 native biodiversity under the Conservation Act 1987 and was concerned that the cold  
87 tolerance and dispersal ability of *P. brassicae* would put all New Zealand endemic  
88 brassica populations at risk except those on sub Antarctic islands (Phillips and Kean,  
89 2013). Indeed, some vulnerable populations were within 10 km of Nelson.  
90 Accordingly, in November 2012 DOC began the first-ever attempt globally to  
91 eradicate a butterfly.

92 The operational details of many previous eradication programs reside in  
93 relatively inaccessible grey literature, which limits opportunities for learning  
94 (Genovesi, 2005; Simberloff, 2009, 2002). This paper aims to help inform future  
95 eradication programs by summarising the methods used and results obtained.

96

## 97 2. Methods

98 We define a 'detection' as the discovery of one or more *P. brassicae* at one location  
99 at one time. Thus, detections refer to the number of inspections that revealed *P.*  
100 *brassicae* rather than to the number of *P. brassicae* individuals found.

101

### 102 2.1 Management and review

103 A strategy was prepared before the eradication attempt commenced that  
104 documented the program's goal, objectives, actions, timeframes, stopping rules, and  
105 staff roles and responsibilities (Toft et al., 2012). A Coordinated Incident  
106 Management System (CIMS) framework was used to structure roles and

107 responsibilities (New Zealand Government, 2014; Additional Information 1). The  
108 program implemented a cycle of “plan, implement, monitor, report and review”, and  
109 emphasised team work, effective communication, and openness to suggestions for  
110 improvement.

111 A Technical Advisory Group (TAG) of six people with expertise in eradication  
112 and invertebrate ecology was assembled and led by DOC (author K. Brown). It  
113 produced plans; provided advice on the scale, intensity and timing of the response;  
114 conducted research; lobbied for financial support; and reported results. The group  
115 comprised three animal pest technical advisors from DOC including an entomologist,  
116 two entomologists from two government research institutes, and a private consulting  
117 entomologist.

118 The TAG assessed program feasibility in November 2013 (Phillips et al., 2013b),  
119 and the program was reviewed in August 2013 and December 2013. The first review  
120 was conducted by DOC and sought to both confirm the program was being well  
121 managed and identify opportunities for improvement (Briden and Broome, 2013).  
122 The second review was conducted by MPI and had similar goals to the first, plus it  
123 also evaluated the program’s likelihood of success (Gill, 2013a). Participants  
124 included three TAG members, nine independent experts, and five MPI staff (Gill,  
125 2013b). Prior to the review, participants were sent a report describing program  
126 progress (Phillips et al., 2013a).

127 From 2013 to 2015, DOC managers were provided with estimates of the  
128 probability of eradication success. Five TAG members and another expert  
129 independently provided estimates using nine criteria developed by the TAG (Phillips  
130 et al., 2019) and the range and mean were reported to managers. Progress was also  
131 publicly reported via a series of annual reports (Phillips et al., 2014a, 2015a, 2016;  
132 Toft, 2013).

133

## 134 *2.2 Operational area*

135 An area of ca. 10000 ha was intensively managed during the eradication attempt and  
136 is termed the ‘operational area’. It included Nelson City (41.29°S, 173.28°E), the  
137 adjoining urban area of Richmond, and farmland (Fig. 1). It was populated by ca.  
138 47000 people living in ca. 28000 households, and the main *P. brassicae* host plants  
139 present were brassica vegetables in home gardens, and nasturtium (*Tropaleum*  
140 *majus*) in gardens and wasteland. Some naturalised brassicas were also present

141 (Phillips et al., 2013a). Commercial brassica crops mainly occurred outside the  
142 operational area.

143 Nelson has a temperate oceanic climate with a summer average maximum  
144 temperature of 22 °C and a summer minimum of 12 °C. Winter average maximum  
145 and minimum temperatures are 14 °C and 4 °C. Average annual rainfall is 1043 mm,  
146 and average annual sunshine is 2449 hours. Mountains border Nelson's eastern  
147 perimeter from the south to the northeast, ocean lies to the northwest, and to the  
148 southwest is an intensively farmed plain.

149 To facilitate management, the operational area was divided into 46 management  
150 blocks (Additional Information 2) with areas ranging from 27–1944 ha. Within blocks,  
151 the units searched were mostly residential properties, though some commercial  
152 properties and public green spaces were also searched. Properties per block ranged  
153 from just two in a block that was predominantly farm land to ca. 2000.

154

### 155 *2.3 Active surveillance*

156 We define **active surveillance as planned systematic searching for *P. brassicae*** by  
157 DOC staff.

158

#### 159 *2.3.1 Field staff*

160 All field staff underwent police vetting and employment checks prior to appointment  
161 and received Authorised Persons training to give them legal access to private  
162 properties without landowner permission under the New Zealand Biosecurity Act  
163 1993. Training included communicating with property owners, managing aggressive  
164 dogs, first aid, identifying *P. brassicae* and its host plants (Anonymous, 2013),  
165 search methods, handling and applying pesticides, and data recording.

166 The eradication attempt began in November 2012 with only **three field staff**. As  
167 the scale of the eradication challenge became clearer, this number was increased to  
168 **24 by April 2013 and to 35 by November** 2014. Field staff were divided into eight  
169 teams, each comprising 2–8 people. Six teams searched for *P. brassicae*, one  
170 specialised in controlling larger areas of host plants, and one responded to residents'  
171 reports of sightings and reinspected previously treated properties. Teams were  
172 issued with VHF and UHF radios, and team leaders carried mobile phones. Each  
173 day teams were assigned to search particular properties specified via analysis of  
174 previous surveillance results (see below).

175 2.3.2 *Prioritising locations to search*

176 The program aimed first to eliminate *P. brassicae*, then to continue surveillance to  
177 confirm eradication. During the **elimination phase**, the program prioritised the  
178 destruction of small peripheral *P. brassicae* populations to minimise spread beyond  
179 the operational area, while **simultaneously treating the larger central** population to  
180 reduce population growth and emigration pressure (Brown et al., 2013). During  
181 spring and autumn, the emphasis was on properties with host plants in blocks  
182 exhibiting comparatively high detection rates. Search locations were regularly  
183 reprioritised based on recent surveillance results, plus factors such as logistics and  
184 season (Phillips, 2014). **During elimination**, locations where *P. brassicae* and its host  
185 plants had seldom been recorded were searched relatively infrequently and mostly in  
186 summer or winter.

187 The program's transition from elimination to monitoring demanded confidence  
188 that *P. brassicae* was absent from the entire operational area, including locations  
189 infrequently searched during the elimination phase. Again, the emphasis of  
190 searching was on properties with host plants. Allocating search effort across all 46  
191 blocks to maximise confidence *P. brassicae* had been eradicated was informed by a  
192 model that estimated relative probabilities of *P. brassicae* being present in each  
193 block (Kean and Phillips, in preparation; Phillips et al., 2016).

194

195 2.3.3 *Search timing and frequency*

196 The phenology of *P. brassicae* was modeled (Kean and Phillips, 2013, in  
197 preparation) using published data for its developmental responses to temperature  
198 (e.g., Davies and Gilbert, 1985) and day length (e.g., Spieth and Sauer, 1991). The  
199 model was validated against observations of *P. brassicae* both in the Northern  
200 Hemisphere and New Zealand, and helped to define the timing and frequency of  
201 searches.

202 *Pieris brassicae* had 2–4 generations per year in Nelson. Most *P. brassicae*  
203 overwintered as pupae, from which adults emerged in spring to lay eggs. In summer,  
204 approximately **half of the population aestivated as pupae**, with second generation  
205 adults emerging in autumn, which coincided with the emergence of third and fourth  
206 generation adults emerging from non-aestivating pupae (Kean and Phillips, 2013).

207 *Pieris brassicae* pupae were difficult to find (Phillips et al., 2014b) and  
208 prevailed in summer and winter. Thus, during these seasons all blocks were  
209 surveilled for host plants to enable the highest risk properties to be targeted the  
210 following autumn or spring when other more detectable life stages predominated.  
211 Nevertheless, some searching for pupae was also conducted in winter (see below).

212 During spring and autumn, consecutive bouts of surveillance in the same  
213 location occurred at different intervals depending on if and when *P. brassicae* had  
214 been detected there. In general, the program aimed to search properties in high  
215 priority blocks frequently enough to prevent any *P. brassicae* eggs laid after the  
216 previous search from becoming pupae before the next search; ca. every 2–4 weeks.  
217 However, if *P. brassicae* was detected on a property, the property was searched  
218 again before any eggs overlooked in the previous search could reach the pupal  
219 stage; ca. every 1–2 weeks. Reinspections of infested properties usually continued  
220 until no *P. brassicae* had been detected in two consecutive inspections. **These short**  
221 **interval reinspections enabled the efficacy of searches for *P. brassicae* to be**  
222 **estimated** (Phillips et al., 2014b).

223

#### 224 2.3.4 Search methods

225 Properties were visited during the day and, if residents were present, permission to  
226 search was requested. If residents were absent, gardens were searched for *P.*  
227 *brassicae* and its host plants, and notification of the search was left. When properties  
228 could not be searched (e.g., due to threatening dogs, locked gates or unhelpful  
229 residents), contact was made again by phone or letter and access arranged.

230 Eggs and larvae were sought by systematically inspecting all host plants. Any  
231 found were removed, **then host plants were treated**. Immature *P. brassicae* were  
232 either killed upon detection, or kept in captivity to monitor parasitism then killed.

233 Pupae were searched for throughout the year, but were explicitly targeted during  
234 winter on properties where mid–late stage larvae had been detected the previous  
235 autumn. Inanimate objects such as fences, garden sheds and house exteriors were  
236 searched using ladders and torches as necessary to inspect cracks and crevices.  
237 Adjacent properties were also searched if it was suspected that larvae had crawled  
238 off the property to pupate.

239 Adults were searched for in sunny locations with abundant nectar sources and  
240 captured with hand-held nets. This was often difficult and time consuming due to *P.*  
241 *brassicae*'s rapid and evasive flight, but was considered worthwhile because:  
242 Capturing gravid females minimised the number of eggs they could otherwise have  
243 laid, potentially over many hectares; and capturing males when adult populations  
244 were low potentially inhibited mate finding and reduced female fecundity.

245 Research was conducted to develop attractants for *P. brassicae* adults, but did  
246 not produce practicably useful results (Sullivan et al., 2014; GP Walker et al., 2013).  
247 However in 2014 a DOC staff member, W. Wragg, developed an ultra-violet (UV)  
248 reflective lure that was attractive to *P. brassicae* adults. Its efficacy was optimised by  
249 measuring the UV reflectivity of various materials (Phillips et al., 2015b) to identify  
250 one with similar reflectivity to *P. brassicae* wings (e.g., Obara et al., 2008; Stavenga  
251 and Arikawa, 2006). A cloth with suitable UV reflectivity was glued to ornamental  
252 butterflies' wings, which moved by solar power, and the models were used to attract  
253 *P. brassicae* adults towards staff with nets.

254

#### 255 2.4 Passive surveillance

256 Publicity aimed to engender support for the eradication program and promote reports  
257 of *P. brassicae*, and occurred at times when *P. brassicae* adults, eggs and larvae  
258 were about to appear. Communication methods included: DOC's website; a  
259 Facebook page; newspapers; magazines; billboards; leaflets and letters dropped in  
260 letter boxes; information displays and fridge magnet giveaways at events; face to  
261 face discussions with vegetable sellers and other groups; public talks; school visits;  
262 thank you cards to helpful property owners; newsletters regularly sent to  
263 stakeholders; advertisements at a local cinema; and advertisements, interviews and  
264 articles on local and national radio stations. Information given included descriptions  
265 of risks associated with: Accidentally moving *P. brassicae* pupae out of Nelson on  
266 vehicles such as campers and caravans, which are often stored near gardens;  
267 accidentally moving *P. brassicae* larvae out of Nelson on home-grown brassica  
268 seedlings, vegetables and vegetable waste; and use of brassicas as winter cover  
269 crops. Automobile mechanics were asked to be vigilant for *P. brassicae* pupae when  
270 conducting safety checks of vehicles, trailers, and caravans. Interpreters were  
271 employed to talk to recent New Zealand immigrants in their first language. The public  
272 were asked to report sightings of *P. brassicae* via a continuously monitored toll-free

273 number operated by MPI. Reports were immediately conveyed to DOC, which  
274 responded within 48 hours, usually visiting the properties for verification.

275

#### 276 2.4.1 Bounty hunt

277 A NZ\$10 bounty was offered for each dead *P. brassicae* adult given to DOC during a  
278 2 week school holiday in spring 2013. The bounty was only offered for this one  
279 period to minimise any motivation to culture *P. brassicae* for profit.

280

#### 281 2.5 Population delimitation

282 Monitoring for *P. brassicae* outside the operational area occurred via active  
283 surveillance, passive surveillance, monitoring of native brassica populations by DOC,  
284 and searching commercial brassica crops by staff from a nearby crop research  
285 institute, who searched for *P. brassicae* when conducting routine scouting for other  
286 pests in brassica crops.

287

#### 288 2.6 Treatments

##### 289 2.6.1 Insecticides

290 A program review recommended that all *P. brassicae* host plants at a site should be  
291 sprayed with insecticide whenever eggs or larvae were found because search

292 efficacy was likely < 100% (Briden and Broome, 2013). Consequently, the BioGro-  
293 certified organic insecticide Entrust® SC Naturalyte® was chosen as the most socially  
294 acceptable option. The horticultural oil D-C-Tron® was added to improve spray  
295 coverage and increase egg mortality. Spraying was usually conducted after gaining  
296 consent from property occupants, but occasionally occurred without consent when  
297 the occupants could not be contacted and late-stage larvae were found. If occupants  
298 were opposed to this treatment then one of the following alternatives were used:  
299 Either removing or regularly inspecting host plants, or applying a microbial  
300 insecticide containing toxins from the bacterium *Bacillus thuringiensis* (Bt).

301

##### 302 2.6.2 Host plant control

303 Host plant patches were prioritised for control based on their size and proximity to *P.*  
304 *brassicae* detections, and treated sites were reinspected to verify treatment efficacy.  
305 Staff with abseiling experience accessed host plants on steep terrain. Nasturtium



306 growing in unpopulated areas was treated with a mixture of glyphosate, a desiccant  
307 (carfentrazone-ethyl), a surfactant, plus an insecticide in case any *P. brassicae* were  
308 present.

309

### 310 2.6.3 Biological control

311 During the 1930s, two parasitic wasp species were introduced to New Zealand for  
312 biological control of *P. rapae*: *Cotesia glomerata* L. (Hymenoptera: Braconidae),  
313 which parasitises larvae, and *Pteromalus puparum* L. (Hymenoptera: Pteromalidae),  
314 which parasitises late-stage larvae and pupae (Muggeridge, 1943). Both species  
315 also parasitise *P. brassicae* (Muggeridge, 1943) and were present in Nelson before  
316 *P. brassicae* was detected there.

317 Parasitism of *P. brassicae* by *C. glomerata* within the operational area was  
318 evaluated from October 2013 until June 2014 during active surveillance. *Pieris*  
319 *brassicae* larvae were subsampled (ca. 10 larvae per brood) and individuals were  
320 placed in separate pottles with brassica leaf for food then reared to fate (adulthood,  
321 death or parasitoid emergence) (Walker et al., 2014).

322 To attempt to augment parasitism in the operational area, *C. glomerata* cocoons  
323 were collected from *P. rapae* infestations in several New Zealand locations (G  
324 Walker et al., 2013; Walker et al., 2014) and from *P. brassicae* infestations in  
325 Nelson. Cocoons were maintained until adult emergence, and adults were provided  
326 with sugar solution and allowed to mate. During autumn 2014 and autumn 2015, *C.*  
327 *glomerata* adults were released in locations where there had been either: Recent  
328 repeated *P. brassicae* detections; recent detections in areas that were difficult to  
329 search; or few recent searches. No attempt was made to evaluate if the releases  
330 increased parasitism rates.

331 In autumn 2015, laboratory cultured *Pt. puparum* were released as larvae  
332 developing within *P. rapae* pupae at locations where there was a high risk of *P.*  
333 *brassicae* late-stage larvae and pupae being present (Richards et al., 2016). To  
334 measure if the releases increased parasitism rates, unparasitized sentinel *P. rapae*  
335 pupae were situated in cages accessible to *Pt. puparum* adults either within 2–3 m of  
336 the release locations, or > 200 m from them, then monitored for parasitism (Richards  
337 et al., 2016).

338 *2.7 Data collection and management*

339 Data management was continuously refined and ultimately rested on a Geospatial  
340 Information System (GIS) built on an Environmental Services Research Institute  
341 ArcGIS Server. Web GIS (Geocortex Essentials) Version 4.4.2 was used to enter  
342 property inspection data. ArcGIS Version 10.3.1 was used to analyse spatial data  
343 and produce interactive maps, with dynamic queries indicating the highest priority  
344 properties to surveil. It was also used to help update the underlying Nelson cadastre  
345 to ensure that teams visited the correct addresses.

346 Field teams took a map of locations to be searched, conducted the inspections,  
347 and manually recorded details of any *P. brassicae*, host plants and access issues  
348 (Additional Information 3). This information was transferred to the GIS typically within  
349 48 hours and used to produce updated maps for subsequent surveillance. A data  
350 analyst refined processes for data entry, capture, storage and analysis, and  
351 developed models that provided staff with access to reports on factors such as  
352 blocked access, safety (e.g. aggressive dogs), surveillance results, host plant  
353 control, and properties to be searched.

354

355 *2.8 Preparing this paper*

356 Data were manipulated and Figures 1–3 created using the statistical programming  
357 language R version 3.6.0 (R Core Team, 2019) and functions in the R packages  
358 ‘tidyverse’ (Wickham, 2017), ‘sf’ (Pebesma, 2018) and ‘gggn’ (Baquero, 2019).  
359 Figures 1 and 3 used data sourced from the Land Information New Zealand Data  
360 Service licensed for reuse under CC BY 4.0.

361

362 **3. Results**

363 *3.1 Management and review*

364 The September 2013 feasibility assessment (Phillips et al., 2013b) concluded that  
365 seven of the nine criteria of Phillips et al. (2019) were being substantially met  
366 whereas two were only being marginally met: These were (i) *Irrespective of its*  
367 *density, the population can be forced to decline from one year to the next*, and (ii)  
368 *Immigration and emigration can be prevented*.

369 DOC’s August 2013 review made recommendations, all subsequently  
370 implemented, to increase insecticide use on infested properties, prepare a formal  
371 communication plan, and increase public awareness and community involvement in  
372 the program (Briden and Broome, 2013). MPI’s December 2013 review concluded

373 that the program was being appropriately managed, it was too early to evaluate  
374 feasibility, and the program was worth continuing, but was concerned about *P.*  
375 *brassicae* escaping from the operational area (Curran, 2013).

376 An October 2013 estimate of the program's probability of success had a mean  
377 of 56% (range 50–60 %, n = 6). However, the estimates increased in November  
378 2014 to 80 % (range 70–92 %, n = 6) and in July 2015 to 91 % (range 81–98 %, n =  
379 6).

380

### 381 3.2 Active surveillance

382 Repeated inspections of infested properties enabled the efficacy of searches for *P.*  
383 *brassicae* to be estimated (Phillips et al., 2014b). Following a single inspection, the  
384 proportion of properties where eggs or larvae were detected during the subsequent  
385 inspection declined from 32–52% in April–May 2013 when most staff were  
386 inexperienced to 5–25% in September–October 2013 when staff were fully trained.  
387 After late 2013 when insecticide use on infested properties increased, the proportion  
388 of properties where some *P. brassicae* eggs or larvae remained after an inspection  
389 declined to 1–11%. Thus, an insecticide treatment plus just one follow up inspection  
390 were sufficient to ensure all eggs and larvae had been eliminated from  $\geq 99$  % of  
391 infested properties (Phillips et al., 2014b). However, the program generally  
392 maintained two follow up inspections to maximise treatment efficacy.

393 Early in the program, field staff suspected that infested properties occurred in  
394 clusters with radii of ca. 50–250 m. Thus, when *P. brassicae* was detected on a  
395 property, an early practice was to also inspect adjacent properties within these radii  
396 (Phillips et al., 2014a). However, a spatial analysis of surveillance data found no  
397 evidence for clustered detections, thus it was concluded that searching properties  
398 that surround an infested property was unlikely to increase detection rates above  
399 searching randomly chosen properties in the same block (Phillips and van Koten,  
400 2014) and the practice was discontinued. Further evidence that individual *P.*  
401 *brassicae* females often oviposited in disparate locations 2–5 km apart was obtained  
402 by analysing genetic variation in the mitochondrial COI gene of all detected  
403 specimens (Hiszczynska-Sawicka and Phillips, 2014). Because the location and life  
404 stage of every detected specimen had been recorded, the spatial distributions of  
405 potential offspring of each captured female could be modelled by matching the

406 mitochondrial genotypes of female and immature *P. brassicae* while assuming a  
407 range of values for female longevity (Phillips, Sawicka and Kean, unpublished).

408 The UV lures were first deployed in October 2014 when detection rates had  
409 already declined to low levels (Fig. 2). *Pieris brassicae* adults approached the lures  
410 in a manner similar to *P. rapae* (Obara et al., 2008a, b), but never alighted on them.  
411 From 10 October 2014 to 3 November 2014, it took 180 person-hours to capture  
412 three *P. brassicae* adults without a lure, whereas it took 44 person-hours to capture  
413 seven with a lure.

414 Overall, field staff conducted ca. 260000 inspections, of which ca. 3000 (1 %)  
415 detected *P. brassicae* (Phillips et al., 2016). At any one time, ca. 60% of residential  
416 properties had gardens and ca. 40% had *P. brassicae* host plants, though the actual  
417 properties making up these proportions varied with time, thus necessitating ongoing  
418 monitoring to track properties with host plants. The most abundant host plant in  
419 Nelson was nasturtium and ca. 35% of detections occurred on this plant (Phillips et  
420 al., 2014a). A similar proportion of detections occurred on broccoli, even though it  
421 was recorded less frequently in Nelson, which suggested it was a preferred host  
422 (Phillips et al., 2014a).

423

### 424 3.3 Passive surveillance

425 A bounty for *P. brassicae* was offered for 2 weeks in spring 2013. In all, 319  
426 individuals or groups handed in 3268 adults comprising 133 *P. brassicae* (4 %) and  
427 3135 *P. rapae* (96 %) (Phillips et al., 2013a). The *P. rapae* were from locations up to  
428 130 km from Nelson, whereas *P. brassicae* only came from within the operational  
429 area.

430 The public submitted 1936 reports (additional to the bounty) of which 586 (30  
431 %) proved to be *P. brassicae* (Phillips et al., 2016). Most reports (76 %) were made  
432 via the toll-free number, and the remainder were largely reported by phone directly to  
433 DOC's office in Nelson (Phillips et al., 2016).

434

### 435 3.4 Temporal changes in spatial distribution

436 *Pieris brassicae* was first detected in May 2010 and by October 2010 it had been  
437 found at eight properties in urban Nelson up to 12 km apart (Philip, 2010). Over the  
438 next 2 years, passive surveillance reports suggested its distribution had not  
439 dramatically changed (Philip, 2012) (Fig. 3, 'Before 1 Dec 2012').

440 When the eradication program began in summer 2012, there were several  
441 detections outside the operational area. In summer 2012-13 (Fig. 3), one  
442 (parasitised) *P. brassicae* larva was found ca. 25 km west of Port Nelson near Upper  
443 Moutere (Fig. 1). This required intensive work to gain confidence additional *P.*  
444 *brassicae* had not escaped from the operational area, including increased publicity  
445 between Upper Moutere, Motueka and Nelson (Fig. 1). The larva was likely taken to  
446 Upper Moutere from Nelson on an infested cabbage. Between autumn 2013 and  
447 autumn 2014 (Fig. 3), several *P. brassicae* were detected ca. 11 km north of Port  
448 Nelson at Glenduan (Fig. 1), which also required significant treatment. In summer  
449 2013-14 (Fig. 3), one adult was detected ca. 15 km southwest of Port Nelson at Hope  
450 and another was detected ca. 10 km northeast of Port Nelson at Lud Valley (Fig. 1).  
451 Intensive searching in the vicinities of these detections revealed no further *P.*  
452 *brassicae*.

453 Despite such dispersal events, from autumn 2014 *P. brassicae* became  
454 increasingly confined to central Nelson (Fig. 3), and it became apparent during 2016  
455 that the last detection had occurred near central Nelson in summer 2014-15 (Fig. 3).  
456 Thereafter, active surveillance persisted until winter 2016 when confidence that *P.*  
457 *brassicae* had been eliminated was sufficient to terminate the program (Fig. 3).

458

### 459 3.5 Temporal changes in detection rates

460 Eggs, larvae and adults of *P. brassicae* were more detectable than pupae, thus there  
461 were peaks in detection rates during spring and autumn when they were more  
462 prevalent than pupae (Fig. 2). Monthly rates peaked in September 2013 when *P.*  
463 *brassicae* (including all life stages) was detected on 9% of 2931 inspected  
464 properties. By this time, staff had been fully trained, *P. brassicae* was relatively  
465 abundant, and most of the population was exposed to control (i.e., few pupae).  
466 Thereafter, rates generally declined, though they showed regular smaller peaks each  
467 autumn and spring until the end of 2014. They declined to zero in January 2015 and  
468 remained there until 4 June 2016 when surveillance ended (Fig. 2).

469

470 3.6. *Treatments*

471 3.6.1 *Insecticides*

472 Following a detection, ca. 30 % of property owners asked for an alternative treatment  
473 to Entrust® SC Naturalyte®: About 20 % chose host plant removal, 5 % chose regular  
474 host plant checks, and the remainder chose Bt (Phillips et al., 2015a).

475

476 3.6.2 *Host plant control*

477 Host plants were controlled on a mean of  $2620 \pm 489$  ( $\pm$  SD) properties per year,  
478 with some properties treated up to three times annually to manage regrowth.  
479 Specialist abseiling skills and/or commercial herbicide sprayers were needed to  
480 apply treatments on ca. 15 properties per year. Nasturtium and other naturalised  
481 brassicas such as wallflower (*Erysimum* spp.) most often required specialist  
482 attention, with patches of up to 500 m<sup>2</sup> present in some steep locations.

483

484 3.6.3 *Biological control*

485 Monitoring of *C. glomerata* parasitism of *P. brassicae* during October 2013–June  
486 2014 revealed that 65% of *P. brassicae* broods ( $n = 130$ ) contained *C. glomerata*,  
487 and a mean of 35% of larvae ( $n = 999$ ) per brood were parasitised (Walker et al.,  
488 2014). To augment parasitism, ca. 10000 *C. glomerata* adults were released in the  
489 operational area during autumn 2014 and a further ca. 6600 were released in  
490 autumn 2015, though it is unknown if this increased parasitism rates (Phillips et al.,  
491 2015a).

492 During autumn 2015, over 14000 *Pt. puparum* adults were released at 17  
493 Nelson properties (Richards et al., 2016). Parasitism of sentinel *P. rapae* was rare—  
494 as were detections of *P. brassicae* pupae—and no effect of the releases on  
495 parasitism rates by *Pt. puparum* was detected (Richards et al., 2016).

496

497 3.7 *Data collection and management*

498 Early data entry issues included a GIS interface that: Allowed users to inadvertently  
499 enter incorrect/invalid inspection dates and misspelled addresses; and provided  
500 users with inadequate confirmation that new records had been successfully entered  
501 and saved, which often provoked duplicate entries. These issues were compounded  
502 by the Nelson cadastre initially being incomplete and out of date, which sometimes  
503 created confusion for field staff about the spatial locations of addresses and resulted

504 in inspection records being assigned to incorrect addresses. These problems  
505 created a dataset that was time-consuming to correct before it could be reliably used  
506 for analysis. In November 2014, a data manager with GIS expertise was assigned  
507 full time to the eradication program, and remaining issues with the cadastre and GIS  
508 interface were resolved by early 2015.

509

#### 510 4. Discussion

511 The attempt to eradicate *P. brassicae* was officially declared successful by MPI  
512 and DOC in November 2016 (Klein, 2016), thus becoming New Zealand's 69<sup>th</sup>  
513 successful arthropod eradication (Kean et al., 2019). However, unlike many other  
514 successful programs in New Zealand and elsewhere, powerful detection tools such  
515 as pheromone traps were unavailable for *P. brassicae*, and detection largely  
516 depended on host/habitat searches. A meta analysis of arthropod eradication  
517 attempts (Tobin et al., 2014) found that programs relying on such methods were  
518 unlikely to succeed, though this effect became non-significant when programs  
519 directed against just two species for which effective detection methods are available,  
520 *Lymantria dispar dispar* (n = 73 programs) and *Ceratitis capitata* (n = 56), were  
521 excluded from analysis. Limitations of the available *P. brassicae* detection methods  
522 may have been partly compensated by *P. brassicae* eggs, larvae and adults being  
523 relatively conspicuous, and eggs and larvae having a distinctive appearance among  
524 New Zealand insects. People are more likely to report distinctive looking insects,  
525 particularly if they are pests (Caley et al., 2019). Moreover, *P. brassicae* eggs and  
526 larvae occurred on low growing, readily accessible host plants, and larval feeding  
527 damage often became increasingly conspicuous as defoliation proceeded. New  
528 Zealand conservationists, particularly DOC, have also had many successes  
529 eradicating mammalian pests for which there are few powerful detection tools (Clout  
530 and Russell, 2006; Russell and Broome, 2016; Towns et al., 2018).

531 Tobin et al. (2014) found that the probability of eradication success declined, and  
532 total program cost grew, with increasing infestation size. The *P. brassicae* infestation  
533 in New Zealand had a maximum extent of about 100 km<sup>2</sup> and previous attempts to  
534 eradicate similar sized infestations had a probability of success of about 0.75 (Tobin  
535 et al., 2014). The *P. brassicae* program cost US\$3.28 million (NZ\$4.97 million, €2.93  
536 million), which was less than the approximately US\$5 million predicted by the meta  
537 analysis (Tobin et al., 2014).

538 Numerous aspects of the eradication program additional to *P. brassicae*'s  
539 conspicuousness and accessibility likely contributed to its success at relatively low  
540 cost. The program engendered strong public support and received valuable reports  
541 of sightings that accounted for ca. 20% of all *P. brassicae* detections. This support  
542 was fostered by comprehensive publicity, rapid responses to public reports,  
543 respectful and communicative staff, and the availability of an effective organic  
544 insecticide which was more acceptable to many residents than synthetic chemical  
545 alternatives. The bounty particularly excited public interest, plus it eliminated some  
546 *P. brassicae* and provided independent evidence that the population had been  
547 correctly delimited. It was also helpful that in 2001 MPI had declared *P. brassicae* an  
548 Unwanted Organism under the New Zealand Biosecurity Act 1993 because it gave  
549 authorised staff the legal right to search and treat private properties for *P. brassicae*.  
550 Moreover, some DOC staff had this authorisation before the program began, and  
551 after it commenced they expedited training to authorise additional staff.

552 Sometimes when nonnative organisms are discovered in new regions, little  
553 technical information is available to support effective responses (Pluess et al., 2012).  
554 However, numerous studies of *P. brassicae* in its native range were available to  
555 support aspects of the eradication attempt including species diagnosis, identifying  
556 effective chemical treatments, defining the butterfly's host range and natural  
557 enemies, and developing a phenology model and lure. Unfortunately, such  
558 information had not been used to develop preparedness plans prior to the  
559 establishment of *P. brassicae* in New Zealand, which might have further increased  
560 the probability of eradication success (Pluess et al., 2012).

561 Several aspects of *P. brassicae*'s New Zealand habitat and ecology were  
562 fortuitously helpful to the program. Numerous *P. brassicae* natural enemies were  
563 present in Nelson and probably facilitated population suppression. These included:  
564 the insect parasitoids *C. glomeratus* and *Pt. puparum* (Muggeridge, 1943); and  
565 insect predators such as *Vespula vulgaris*, *V. germanica* (Brodmann et al., 2008),  
566 *Polistes chinensis antennalis* (Clapperton, 1999), various species of ants (Jones,  
567 1987), spiders, harvestmen and predatory beetles (Dempster, 1967) and birds  
568 (Baker, 1970). The butterfly's potential population growth rate in Nelson was also  
569 limited by a proportion of the population entering aestivation, which reduced that part  
570 of the population's annual number of generations (Spieth et al., 2011; Kean and  
571 Phillips, 2013).



572 Throughout the program, doubt persisted that the feasibility criterion *Immigration*  
573 *and emigration can be prevented* (Phillips et al., 2019) could be met. The possibility  
574 that people would accidentally carry *P. brassicae* immatures beyond the operational  
575 area (e.g., on infested host material) and the ability of *P. brassicae* adults to fly long  
576 distances (Spieth and Cordes, 2012) meant there was constant potential for the pest  
577 to escape the operational area and establish elsewhere. This risk was partly  
578 mitigated by both comprehensive publicity and assiduous treatment of pest  
579 populations on the periphery of the operational area. Nelson's topography probably  
580 also helped to reduce emigration rates because ocean lies to its northwest, the  
581 mountains to its east contained few host plants, and arguably the sole benign  
582 pathway for natural dispersal was across the agricultural plains to its south.  
583 Moreover, the abundant and diverse *P. brassicae* natural enemies in New Zealand  
584 might have reduced the chance that emigrants could found new populations: Such  
585 biotic resistance has been observed in other insect host–natural enemy systems  
586 (Funderburk et al., 2016; Schulz et al., 2019).

587 An effective program structure, sound leadership, and emphases on assiduous  
588 field work, team spirit, open communication and an 'eradication attitude' (Brown and  
589 Brown, 2015) were undoubtedly crucial to the program's success, as was scientific  
590 support. However, some TAG members and scientists conducted work that was  
591 beyond their role if they possessed expertise that the program urgently needed.  
592 Examples included governance, project management, operational planning and  
593 management, data cleaning and analysis, and species diagnostics. Such role  
594 flexibility and commitment were important for maintaining the momentum of the  
595 eradication program whenever bottlenecks in staff numbers or expertise became  
596 evident.

597 The data management issues experienced predominantly during the first 2 years  
598 of the program reduced operational and analytical efficiency, but did not create  
599 serious doubt about achieving the feasibility criterion, "*Programme is effectively*  
600 *managed, and its status is reliably monitored and accurately recorded*" (Phillips et  
601 al., 2019). This was because it was always apparent that the data were being  
602 collected and corrected. However, the inefficiencies suffered would probably have  
603 been avoided by employing a qualified full-time data manager with access to a  
604 suitable GIS from the outset.

605 Although the eradication attempt was assisted by numerous factors, it still  
606 presented many ecological, technical and operational uncertainties (Brown et al.,  
607 2019) and, like most other eradication programs, it was complex (Vreysen et al.,  
608 2007; Simberloff et al., 2013). Quantifying benefits and assessing feasibility are  
609 important prerequisites to commencing an eradication program (Broome et al., 2005;  
610 Brown et al., 2019; Vreysen et al., 2007). With *P. brassicae*, an inability to measure  
611 the conservation values at risk in dollars terms and uncertainty about feasibility  
612 delayed the program's commencement by 2.5 years (Brown et al., 2019) even as *P.*  
613 *brassicae* population growth was increasing the eradication challenge. Nevertheless,  
614 the delay between detection and program commencement was less than the  
615 threshold of about 4 years beyond which eradication success becomes much less  
616 likely, as identified from a meta analysis of 173 eradication programs (Pluess et al.,  
617 2012).

618 The program began just as DOC was being restructured, which disrupted  
619 internal communication, created uncertainty about roles and budgets, and distracted  
620 managers. This culminated in the program receiving inadequate funding during  
621 January–June 2015 and being forced to reduce field staff, whose numbers were  
622 approximately halved during February–March 2015, then cut to zero during May–  
623 June 2015. However, in July 2015 the program's budget was renewed, many of the  
624 program's former field staff returned, and the eradication attempt recovered from  
625 what was widely perceived as a critical threat to its success. It subsequently became  
626 apparent that the last detection of *P. brassicae* had already occurred on 16  
627 December 2014 and, critically, the renewed funding enabled the species' absence  
628 from Nelson to be demonstrated. The program ceased on 4 June 2016 and *P.*  
629 *brassicae* was officially declared eradicated from New Zealand on 22 November  
630 2016 (Office of the Minister of Conservation, 2016), 6.5 years after it was first  
631 detected and 4 years after the eradication attempt commenced.

632

### 633 **Acknowledgements**

634 We thank the following DOC staff members for their patient and persistent efforts:  
635 Neil Clifton, who gave the go-ahead despite the uncertainty; Bruce Vander Lee and  
636 Mike Shephard, who were Project Managers; Simon Bayly and Julie Murphy, who  
637 were Operations Managers; James Reid, who built the GIS database; Jo Rees, who  
638 led planning; Senay Senait and Kath Henderson, who managed the data; Nicola

639 Gourlay, Eva Pomeroy and Rosemary Vander Lee, who managed logistics/  
640 administration; Jaine Cronin, Sally Leggett and Trish Grant who made major  
641 contributions to community engagement; Dan Chisnall and Derek Brown, who  
642 managed host plant control; Keith Briden, who helped to review the program; and  
643 over 60 people who worked in the field. We also acknowledge the many people from  
644 MPI, AgResearch, Better Border Biosecurity (B3), Plant & Food Research and  
645 Vegetables New Zealand who generously provided their time, advice, support and  
646 expertise, particularly John Kean, Ela Sawicka and Nicky Richards (AgResearch/  
647 B3). We also thank John Dugdale (Landcare Research) and Henk Geertsema  
648 (University of Stellenbosch) for their valuable advice, and the experts who reviewed  
649 the program in December 2013: Mandy Barron (Manaaki-Whenua Landcare  
650 Research), Jacqueline Beggs (University of Auckland), Ecki Brockerhoff (Scion),  
651 Stephen Goldson (AgResearch), Mark Hoddle (Center for Invasive Species  
652 Research, UC-Riverside, USA), Margaret Stanley (University of Auckland) and  
653 Patrick Tobin (USDA Forest Service, USA). Oluwashola Olaniyan (Lincoln  
654 University) provided helpful suggestions that improved the manuscript.

655

#### 656 **Role of funding sources**

657 Operational aspects of the eradication program were funded by DOC and  
658 Vegetables New Zealand. Research to support the eradication program was funded  
659 by AgResearch, Better Border Biosecurity, the TR Ellet Agricultural Trust, MPI, and  
660 Plant & Food Research.

661

662

663 **References**

- 664 Anonymous, 2013. *GWB Host Plant Guide*, version 2. Department of Conservation.
- 665 Anonymous, 2002. *NAPPO Phytosanitary Alert System* [WWW Document]. URL  
666 <https://www.pestalerts.org/viewArchNewsStory.cfm?nid=205> (accessed 7.10.19).
- 667 Baker, R., 1970. Bird predation as a selective pressure on the immature stages of  
668 the cabbage butterflies, *Pieris rapae* and *P. brassicae*. *Journal of Zoology* 162, 43–  
669 59.
- 670 Baquero, O. S., 2019. *ggsn: North Symbols and Scale Bars for Maps Created with*  
671 *'ggplot2' or 'ggmap'*. R package version 0.5.0. [https://CRAN.R-](https://CRAN.R-project.org/package=ggsn)  
672 [project.org/package=ggsn](https://CRAN.R-project.org/package=ggsn).
- 673 Briden, K., Broome, K., 2013. *Great White Butterfly Review* (No. DOCDM 1278224).  
674 Department of Conservation, Nelson.
- 675 Brodmann, J., Twele, R., Francke, W., Hölzler, G., Zhang, Q.-H., Ayasse, M., 2008.  
676 Orchids mimic green-leaf volatiles to attract prey-hunting wasps for pollination.  
677 *Current Biology* 18, 740–744.
- 678 Broome, K., Cromarty, P., Cox, A., 2005. Rat eradications-how to get it right without  
679 a recipe. Presented at the Proceedings of the 13th Australasian Vertebrate Pest  
680 Conference, Te Papa, Wellington, pp. 152–157.
- 681 Brown, K., Brown, D., 2015. Control to eradication of *Tradescantia fluminensison*  
682 Stephens Island (Takapourewa): the importance of systematic and persistent effort.  
683 DOC Research & Development Series 15.
- 684 Brown, K., Phillips, CB, Broome, K., Green, C., Toft, R, Walker, G., 2019. Feasibility  
685 of eradicating the large white butterfly (*Pieris brassicae*) from New Zealand: data  
686 gathering to inform decisions about the feasibility of eradication, in: *Island Invasives:*  
687 *Scaling up to Meet the Challenge*, Occasional Paper of the IUCN Species Survival  
688 Commission. International Union for the Conservation of Nature, Gland, Switzerland,  
689 pp. 364–369.
- 690 Brown, K., Toft, R., Van der Lee, B., 2013. *Great White Butterfly Eradication Plan*  
691 (No. DOCDM-1106615). DOC.

692 Caley, P., Welvaert, M., Barry, S.C., 2019. Crowd surveillance: estimating citizen  
693 science reporting probabilities for insects of biosecurity concern. *Journal of Pest*  
694 *Science* 1–8.

695 Cicconardi, F., Borges, P.A.V., Strasberg, D., Oromí, P., López, H., Pérez-Delgado,  
696 A.J., Casquet, J., Caujapé-Castells, J., Fernández-Palacios, J.M., Thébaud, C.,  
697 Emerson, B.C., 2017. MtDNA metagenomics reveals large-scale invasion of  
698 belowground arthropod communities by introduced species. *Mol Ecol* n/a-n/a.  
699 <https://doi.org/10.1111/mec.14037>

700 Clapperton, B., 1999. Abundance of wasps and prey consumption of paper wasps  
701 (Hymenoptera, Vespidae: Polistinae) in Northland, New Zealand. *New Zealand*  
702 *Journal of Ecology* 23, 11–19.

703 Clout, M., Russell, J., 2006. The eradication of mammals from New Zealand islands.  
704 *Assessment and Control of Biological Invasion Risks*’. (Eds F. Koike, MN Clout, M.  
705 Kawamichi, M. De Poorter and K. Iwatsuki.) pp 127–141.

706 Curran, S., 2013. Minutes: Great White Butterfly [independent] Technical Advisory  
707 Group Meeting. Ministry for Primary Industries, Wellington.

708 Davies, C.R., Gilbert, N., 1985. A comparative study of the egg-laying behaviour and  
709 larval development of *Pieris rapae* L. and *P. brassicae* L. on the same host plants.  
710 *Oecologia* 67, 278–281. <https://doi.org/10.1007/bf00384299>

711 De Lange, P.J., Rolfe, J.R., Champion, P.D., Courtney, S., Heenan, P.B., Barkla,  
712 J.W., Cameron, E.K., Norton, D.A., Hitchmough, R., 2013. Conservation status of  
713 New Zealand indigenous vascular plants, 2012. Department of Conservation  
714 Wellington.

715 Dempster, J.P., 1967. The Control of *Pieris rapae* with DDT. I. The Natural Mortality  
716 of the Young Stages of *Pieris*. *Journal of Applied Ecology* 4, 485–500.  
717 <https://doi.org/10.2307/2401350>

718 Feltwell, J., 1982. Large white butterfly: the biology, biochemistry, and physiology of  
719 *Pieris brassicae* (Linnaeus). Springer.

720 Funderburk, J., Frantz, G., Mellinger, C., Tyler-Julian, K., Srivastava, M., 2016. Biotic  
721 resistance limits the invasiveness of the western flower thrips, *Frankliniella*  
722 *occidentalis* (Thysanoptera: Thripidae), in Florida. *Insect science* 23, 175–182.

723 Gardiner, B., 1974. *Pieris brassicae* (L.) established in Chile: another palearctic pest  
724 crosses the Atlantic (Pieridae). *Journal of the Lepidopterists' Society* 28, 269–277.

725 Gardiner, B., 1963. Genetic and environmental variation in *Pieris brassicae*. *Journal*  
726 *of Research on the Lepidoptera* 2, 127–136.

727 Geertsema, H., 1996. The large cabbage white, *Pieris brassicae*, an exotic butterfly  
728 of potential threat to cabbage growers in the Western Cape, South Africa. *Journal of*  
729 *the Southern African Society of Horticultural Sciences* 6, 31–34.

730 Genovesi, P., 2005. Eradications of invasive alien species in Europe: a review.  
731 *Biological invasions* 7, 127–133.

732 Gill, G., 2013a. Terms of Reference for the Great White Butterfly External Technical  
733 Advisory Group: *Pieris brassicae*. Ministry for Primary Industries, Wellington.

734 Gill, G., 2013b. Agenda: MPI & External Technical Advisory Group (Great White  
735 Butterfly) Technical Advisory Group Meeting. Ministry for Primary Industries,  
736 Wellington.

737 Hasenbank, M., Brandon, A., Hartley, S., 2011. White butterfly (*Pieris rapae*) and the  
738 white rust *Albugo candida* on Cook's scurvy grass (*Lepidium oleraceum*). *New*  
739 *Zealand Journal of Ecology* 35, 69–75.

740 Hiszczyńska-Sawicka, E., Phillips, C., 2014. Mitochondrial cytochrome c oxidase  
741 subunit 1 sequence variation in New Zealand and overseas specimens of *Pieris*  
742 *brassicae* (Lepidoptera: Pieridae). *New Zealand Plant Protection* 67, 8–12.

743 Jones, H.P., Holmes, N.D., Butchart, S.H., Tershy, B.R., Kappes, P.J., Corkery, I.,  
744 Aguirre-Muñoz, A., Armstrong, D.P., Bonnaud, E., Burbidge, A.A., 2016. Invasive  
745 mammal eradication on islands results in substantial conservation gains.  
746 *Proceedings of the National Academy of Sciences* 113, 4033–4038.

747 Jones, R.E., 1987. Ants, parasitoids, and the cabbage butterfly *Pieris rapae*. *The*  
748 *Journal of Animal Ecology* 56, 739–749.

749 Kean, J., Phillips, C., 2014. Optimal re-inspection intervals after detection of great  
750 white butterfly (*Pieris brassicae*) at Nelson properties (Report to Ministry for primary  
751 Industries No. RE400/2014/579). AgResearch, Lincoln.

752 Kean, J., Phillips, C., 2013. Phenology and diapause research for great white  
753 butterfly (*Pieris brassicae*). Milestone 4: Detailed spreadsheet model for phenology  
754 (Report for Ministry for Primary Industries No. RE400/2013/481), MPI 16341.  
755 AgResearch, Lincoln.

756 Kean, J., Suckling, D., Sullivan, N., Tobin, P., Stringer, L., Lee, D., Smith, G., Flores  
757 Vargas, R., Fletcher, J., Macbeth, F., 2019. Global eradication and response  
758 database [WWW Document]. Global eradication and response database. URL  
759 <http://b3.net.nz/gerda/index.php> (accessed 6.12.19).

760 Klein, A., 2016. New Zealand is the first country to wipe out invasive butterfly |  
761 newscientist.com [WWW Document]. New Scientist - Daily News. URL  
762 [https://www.newscientist.com/article/2114573-new-zealand-is-the-first-country-to-](https://www.newscientist.com/article/2114573-new-zealand-is-the-first-country-to-wipe-out-invasive-butterfly/)  
763 [wipe-out-invasive-butterfly/](https://www.newscientist.com/article/2114573-new-zealand-is-the-first-country-to-wipe-out-invasive-butterfly/) (accessed 11.29.16).

764 Liebhold, A.M., Berec, L., Brockerhoff, E.G., Epanchin-Niell, R.S., Hastings, A.,  
765 Herms, D.A., Kean, J.M., McCullough, D.G., Suckling, D.M., Tobin, P.C., 2016.  
766 Eradication of invading insect populations: from concepts to applications. Annual  
767 review of entomology 61, 335–352.

768 Molet, T., 2011. CPHST Pest Datasheet for *Pieris brassicae*. USDA-APHIS-  
769 PPQCPHST.

770 Muggeridge, J., 1943. The white butterfly (*Pieris rapae* L.) II. Parasites of the  
771 butterfly. New Zealand Journal of Science and Technology A 25, 1–18.

772 Muggeridge, J., 1942. The white butterfly (*Pieris rapae* L.) I. Its establishment,  
773 spread, and control in New Zealand. New Zealand Journal of Science and  
774 Technology A 24, 107–129.

775 Myers, J.H., Savoie, A., Randen, E. van, 1998. Eradication and pest management.  
776 Annual Review of Entomology 43, 471–491.

777 New Zealand Government, 2014. The New Zealand Coordinated Incident  
778 Management System (CIMS) (No. 2nd edition). Wellington.

779 Obara, Y., Koshitaka, H., Arikawa, K., 2008. Better mate in the shade: enhancement  
780 of male mating behaviour in the cabbage butterfly, *Pieris rapae crucivora*, in a UV-  
781 rich environment. Journal of Experimental Biology 211, 3698–3702.

782 Office of the Minister of Conservation, 2016. Great white butterfly eradication  
783 success: Media release 23 November 2016 [WWW Document]. URL  
784 [http://www.doc.govt.nz/news/media-releases/2016/great-white-butterfly-eradication-](http://www.doc.govt.nz/news/media-releases/2016/great-white-butterfly-eradication-success/)  
785 [success/](http://www.doc.govt.nz/news/media-releases/2016/great-white-butterfly-eradication-success/) (accessed 11.24.16).

786 Pebesma, E., 2018. Simple Features for R: Standardized Support for Spatial Vector  
787 Data. *The R Journal* 10, 439-446, <https://doi.org/10.32614/RJ-2018-009>.

788 Philip, B., 2012. Biosecurity Response Business Case: Great white cabbage butterfly  
789 (No. Version 0.2 (final)). Ministry of Agriculture and Forestry, Biosecurity New  
790 Zealand, Wellington.

791 Philip, B., 2010. Consultation paper - *Pieris brassicae*, the great white cabbage  
792 butterfly, Investigation 2010-161. Biosecurity New Zealand, Wellington, New  
793 Zealand.

794 Phillips, C., 2014. Prioritising GWB management blocks (Report to MPI and DOC  
795 No. RE400 /2014 /607), AgResearch client report. AgResearch, Lincoln.

796 Phillips, C., Brown, K., Broome, K., Green, C., Walker, G., 2019. Criteria to help  
797 evaluate and guide attempts to eradicate arthropod pests, in: IUCN Island Invasives:  
798 Scaling up to Meet the Challenge., Occasional Paper of the IUCN Species Survival  
799 Commission. International Union for the Conservation of Nature, Gland, Switzerland,  
800 pp. 400–404.

801 Phillips, C., Brown, K., Green, C., Broome, K., Toft, R., Shepherd, M., Bayley, S.,  
802 Rees, J., 2016. *Pieris brassicae* (great white butterfly) eradication annual report  
803 2015/16 (Department of Conservation Annual Report). Department of Conservation,  
804 Nelson, New Zealand.

805 Phillips, C., Brown, K., Green, C., Broome, K., Toft, R., Shepherd, M., Bayley, S.,  
806 Rees, J., 2015a. *Pieris brassicae* (great white butterfly) eradication annual report  
807 2014/15 (Department of Conservation Annual Report No. R77017), *Pieris brassicae*  
808 eradication. Department of Conservation, Nelson, New Zealand.

809 Phillips, C., Brown, K., Green, C., Walker, G., Broome, K., Toft, R., Vander Lee, B.,  
810 Shepherd, M., Bayley, S., Rees, J., 2014a. *Pieris brassicae* (great white butterfly)  
811 eradication annual report 2013/14 (Department of Conservation Annual Report).  
812 Nelson, New Zealand.



813 Phillips, C., Brown, K., Green, C., Walker, G., Broome, K., Vander Lee, B., King, M.,  
814 2013a. Great White Butterfly Interim Report Prepared for Ministry for Primary  
815 Industries External Technical Advisory Group, December 2013 (No. docDM-  
816 1307089). Department of Conservation, Nelson.

817 Phillips, C., Green, C., Walker, G., Broome, K., Brown, K., 2013b. Great White  
818 Butterfly Eradication Feasibility Assessment, November 2013. Department of  
819 Conservation, Nelson.

820 Phillips, C., Kean, J., 2013. Predicted seasonal occurrence of *Pieris brassicae* (great  
821 white butterfly) larvae at different New Zealand locations. (Report to Department of  
822 Conservation). AgResearch, Lincoln.

823 Phillips, C., Kean, J., van Koten, C., 2014b. Detection rates of *Pieris brassicae* eggs  
824 and larvae (No. RE400/2014/589), Using surveillance records to support eradication  
825 of great white butterfly from Nelson. AgResearch, Lincoln.

826 Phillips, C., Novoselov, M., Toft, R., 2015b. Ultraviolet reflectivity of *Pieris brassicae*  
827 wings and of materials used for *Pieris* lures (AgResearch Client Report).

828 Phillips, C., van Koten, C., 2014. What search radius around an infested property will  
829 optimise search efficiency for *Pieris brassicae*? (No. 884), Using surveillance records  
830 to support eradication of great white butterfly from Nelson. AgResearch, Lincoln.

831 Pluess, T., Jarošík, V., Pyšek, P., Cannon, R., Pergl, J., Breukers, A., Bacher, S.,  
832 2012. Which factors affect the success or failure of eradication campaigns against  
833 alien species? PloS one 7, e48157.

834 R Core Team, 2019. R: A language and environment for statistical computing. R  
835 Foundation for Statistical Computing, Vienna, Austria. URL [https://www.R-](https://www.R-project.org/)  
836 [project.org/](https://www.R-project.org/).

837 Richards, N., Hardwick, S., Toft, R., Phillips, C., 2016. Enhancing parasitism of *Pieris*  
838 *brassicae* pupae by *Pteromalus puparum*. New Zealand Plant Protection 69, 126–  
839 132.

840 Richardson, E., Voice, D., 2010. Rapid Assessment Report on *Pieris brassicae*  
841 (Rapid Assessment No. IDC 2010 681 161). Biosecurity New Zealand.

842 Russell, J.C., Broome, K.G., 2016. Fifty years of rodent eradications in New Zealand:  
843 another decade of advances. New Zealand Journal of Ecology 40, 197–204.

844 Schulz, A.N., Lucardi, R.D., Marsico, T.D., 2019. Successful Invasions and Failed  
845 Biocontrol: The Role of Antagonistic Species Interactions. *BioScience*.  
846 <https://doi.org/10.1093/biosci/biz075>

847 Simberloff, D., 2009. We can eliminate invasions or live with them. Successful  
848 management projects. *Biological Invasions* 11, 149–157.

849 Simberloff, D., 2002. Today Tiritiri Matangi, tomorrow the world! Are we aiming too  
850 low in invasives control. *Turning the tide: the eradication of invasive species* 4–12.

851 Simberloff, D., Martin, J.-L., Genovesi, P., Maris, V., Wardle, D.A., Aronson, J.,  
852 Courchamp, F., Galil, B., García-Berthou, E., Pascal, M., 2013. Impacts of biological  
853 invasions: what's what and the way forward. *Trends in ecology & evolution* 28, 58–  
854 66.

855 Spieth, H.R., Cordes, R., 2012. Geographic comparison of seasonal migration  
856 events of the large white butterfly, *Pieris brassicae*. *Ecological Entomology* 37, 439–  
857 445. <https://doi.org/10.1111/j.1365-2311.2012.01385.x>

858 Spieth, H.R., Pörschmann, U., Teiwes, C., 2011. The occurrence of summer  
859 diapause in the large white butterfly *Pieris brassicae* (Lepidoptera: Pieridae): A  
860 geographical perspective. *Eur. J. Entomol* 108, 377–384.

861 Spieth, H.R., Sauer, K.P., 1991. Quantitative measurement of photoperiods and its  
862 significance for the induction of diapause in *Pieris brassicae* (Lepidoptera, Pieridae).  
863 *Journal of Insect Physiology* 37, 231–238.

864 Stavenga, D., Arikawa, K., 2006. Evolution of color and vision of butterflies.  
865 *Arthropod structure & development* 35, 307–318.

866 Sullivan, T., Park, K., Manning, L., Twiddle, A., Brown, R., Suckling, D., 2014.  
867 Identification of semiochemicals in *Pieris rapae* and *P. brassicae* (Interim Progress  
868 Report). Plant and Food Research Ltd, Lincoln.

869 Tobin, P., Kean, J., Suckling, D., McCullough, D., Herms, D., Stringer, LD, 2014.  
870 Determinants of successful arthropod eradication programs. *Biological Invasions* 16,  
871 401–414. <https://doi.org/DOI 10.1007/s10530-013-0529-5>

872 Toft, R., 2013. Great White Butterfly Eradication Annual Report 2012/13 (No. ENT-  
873 031). Entecol.

874 Toft, R., Brown, K., Courtney, S., Green, C., 2012. Proposed Eradication Strategy for  
875 Great White Cabbage Butterfly (*Pieris brassicae*). EntEcol.

876 Towns, D., Broome, K., Saunders, A., 2018. Ecological restoration on New Zealand  
877 islands: a history of shifting scales and paradigms. Australian Island Arks:  
878 Conservation, Management and Opportunities 205.

879 Townsend, A.J., de Lange, P.J., Duffy, C.A., Miskelly, C.M., Molloy, J., Norton, D.A.,  
880 2008. New Zealand threat classification system manual. Department of  
881 Conservation, Wellington 16, 2008–11.

882 Vitousek, P.M., D'Antonio, C.M., Loope, L.L., Rejmánek, M., Westbrooks, R., 1997.  
883 Introduced species: a significant component of human-caused global change. NZ J  
884 of Ecology 21, 1–16.

885 Vreysen, M., Robinson, A., Hendrichs, J., 2007. Area-wide control of insect pests:  
886 from research to field implementation. Springer Science & Business Media,  
887 Dordrecht, The Netherlands.

888 Walker, G, MacDonald, F., Wallis, R., Shaw, P., 2013. Management of the Great  
889 White Butterfly (Report for Sustainable Farming Fund, and Vegetables NZ No.  
890 8929). Plant and Food Research Ltd, Mt Albert, Auckland.

891 Walker, GP, MacDonald, F., Wright, P., Connolly, P., 2013. Great White Butterfly  
892 Trap Improvements. Schedule 1: Improve visual lure and kill (IVLK) for *Pieris*  
893 *brassicae*, great white butterfly (GWB) (Report for Ministry for Primary Industries No.  
894 8829), Client Project No. 16400. Plant and Food Research Ltd, Mt Albert, Auckland.

895 Walker, G., Shaw, P., Wallis, R., MacDonald, F., Harnett, D., 2014. Surveys of  
896 parasitism of larvae of *Pieris* species in Nelson 2013/14 (Draft summary for DOC  
897 GWB eradication project annual reporting 2013/14 No. 10205). Plant and Food  
898 Research Ltd, Mt Albert, Auckland.

899 Wardle, D.A., Bardgett, R.D., Callaway, R.M., Van Der Putten, W.H., 2011.  
900 Terrestrial ecosystem responses to species gains and losses. Science 332, 1273–  
901 1277. <https://doi.org/10.1126/science.1197479>.

902 Wickham, H., 2017. tidyverse: Easily Install and Load the 'Tidyverse'. R package  
903 version 1.2.1. <https://CRAN.R-project.org/package=tidyverse>.

904 **Figure captions**

905

906 Fig. 1. Map of Nelson and its environs with the *Pieris brassicae* eradication  
907 operational area shaded in blue. The red rectangle in the inset map indicates the  
908 position of the main map relative to the rest of New Zealand.

909

910 Fig. 2. Monthly *Pieris brassicae* detection rates from February 2013 to June 2016.  
911 Error bars show 95% binomial confidence intervals.

912

913 Fig. 3. Spatial distribution of *Pieris brassicae* from May 2010 to June 2016. Green  
914 markers show search locations where *P. brassicae* was not detected and red  
915 markers show locations where it was detected.

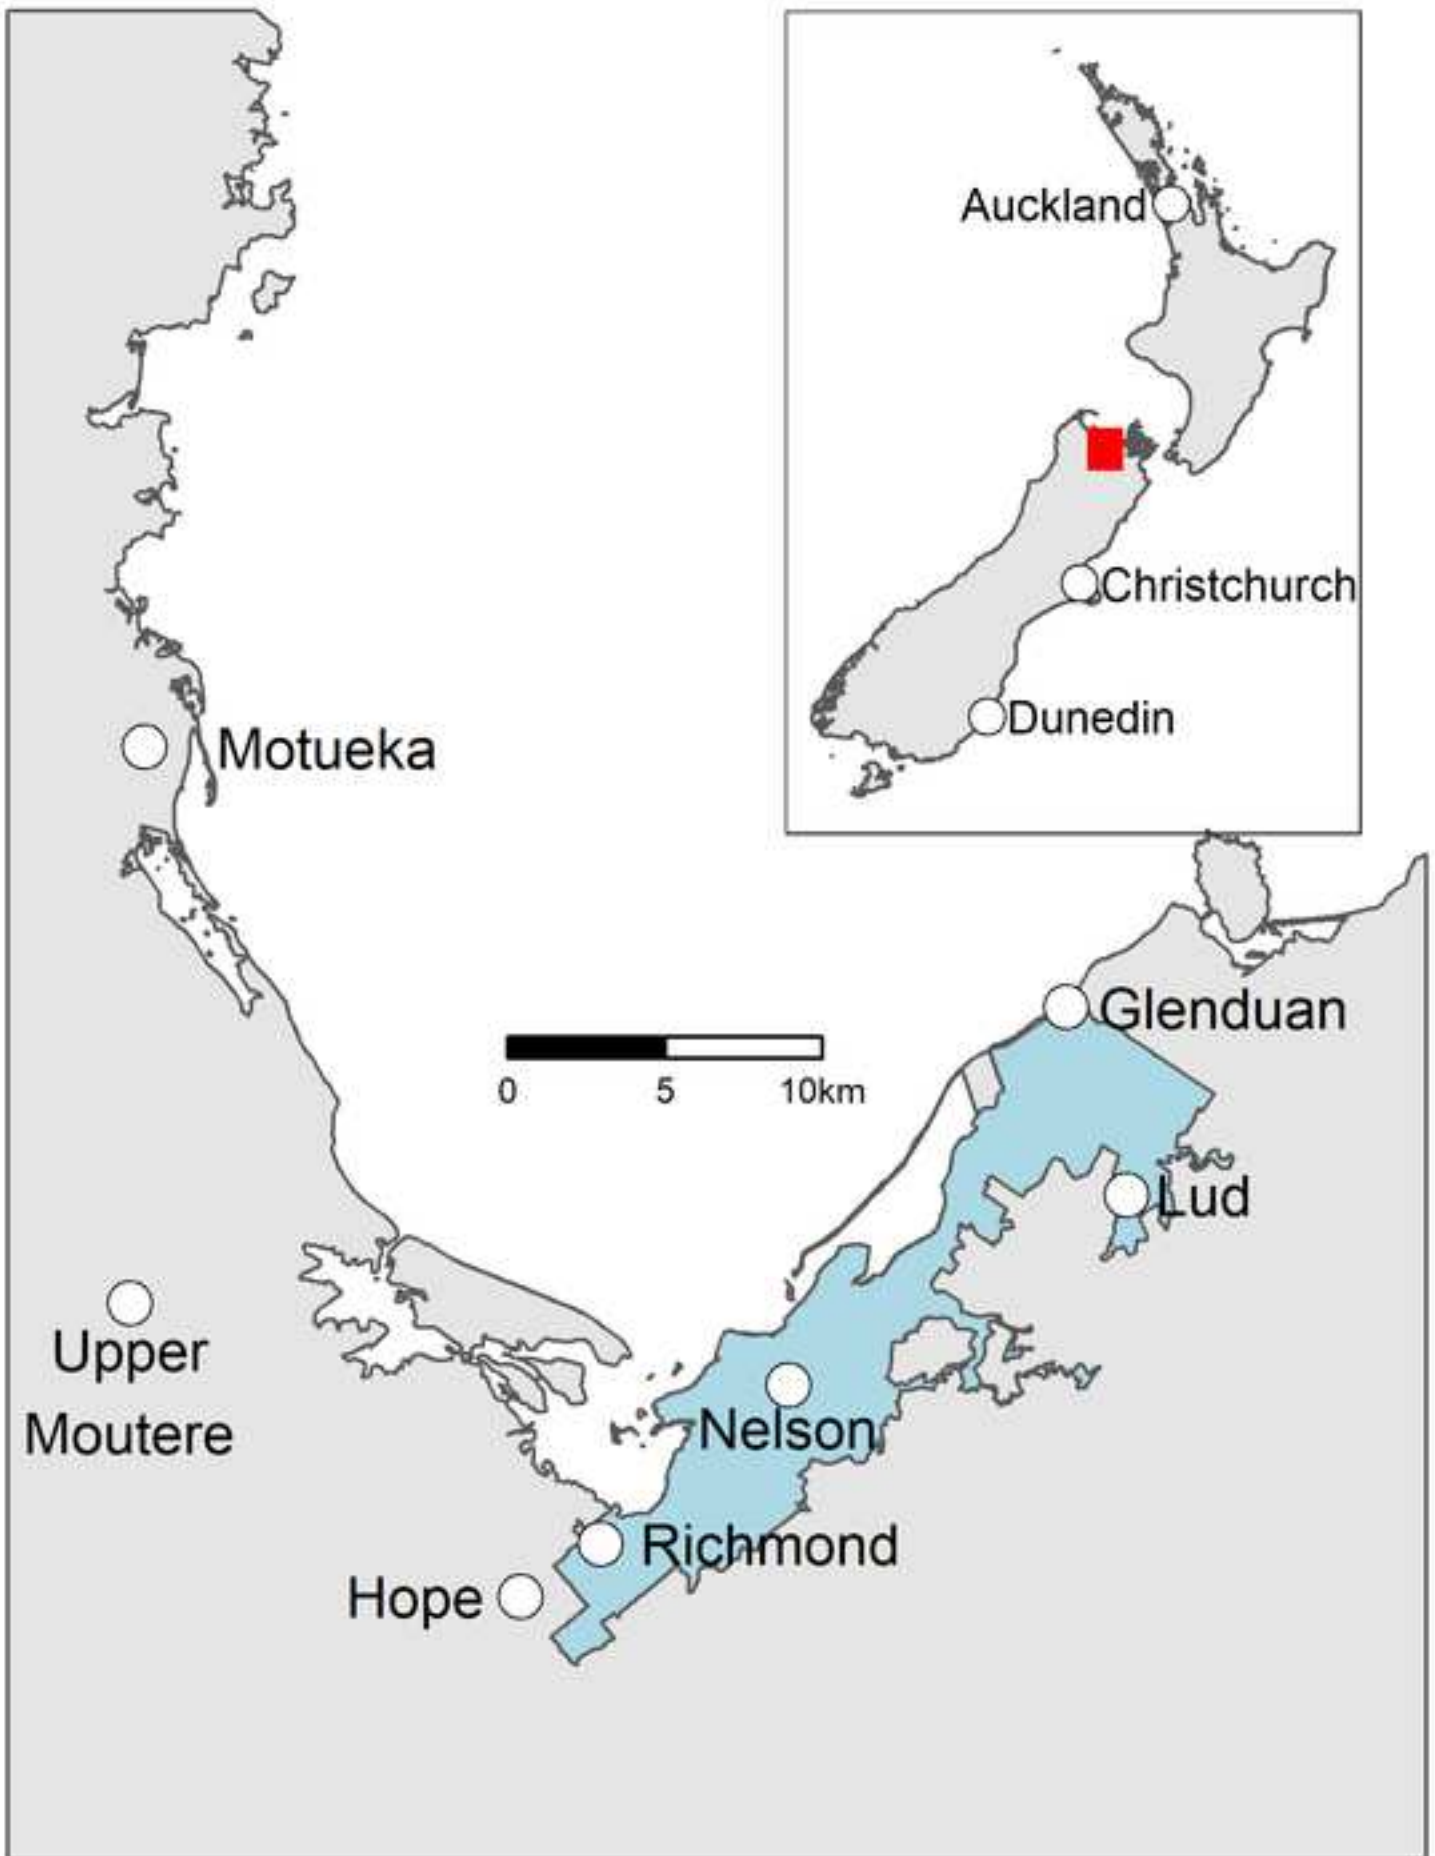

Figure 2

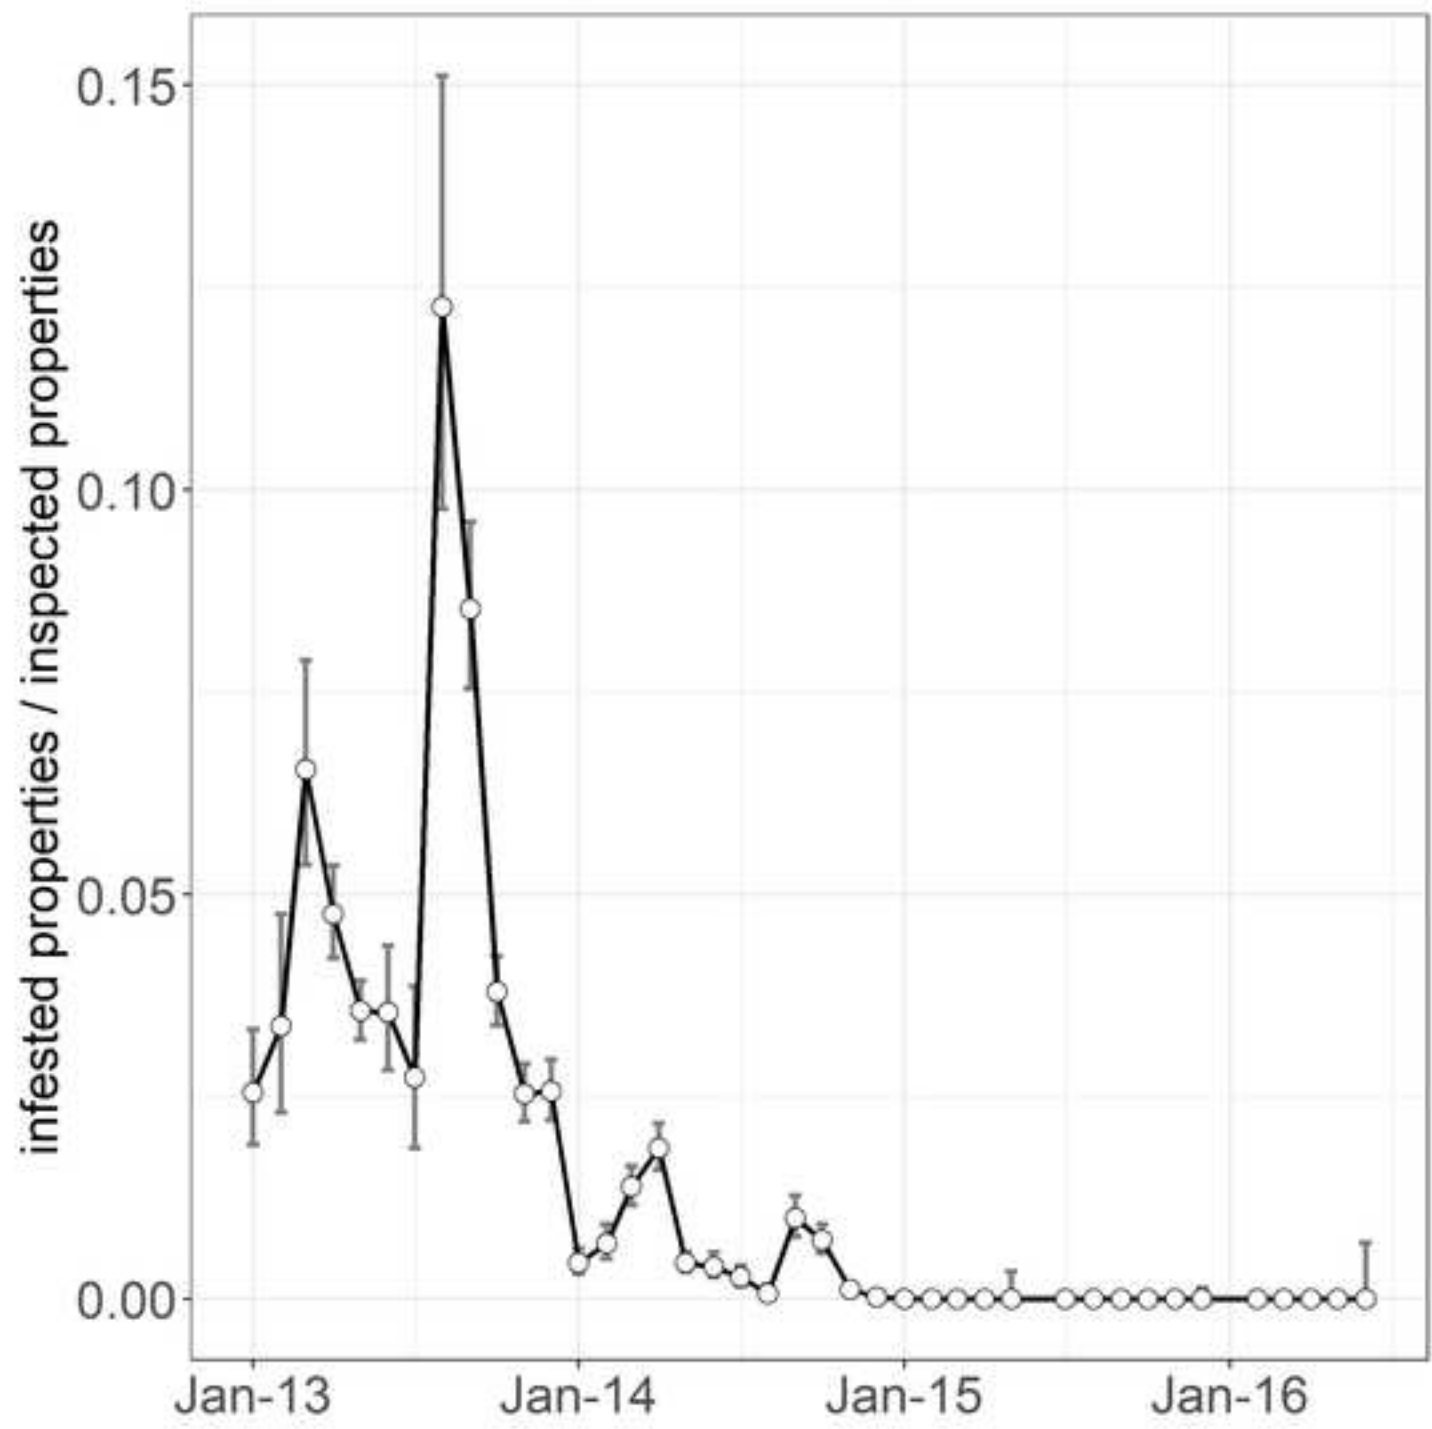

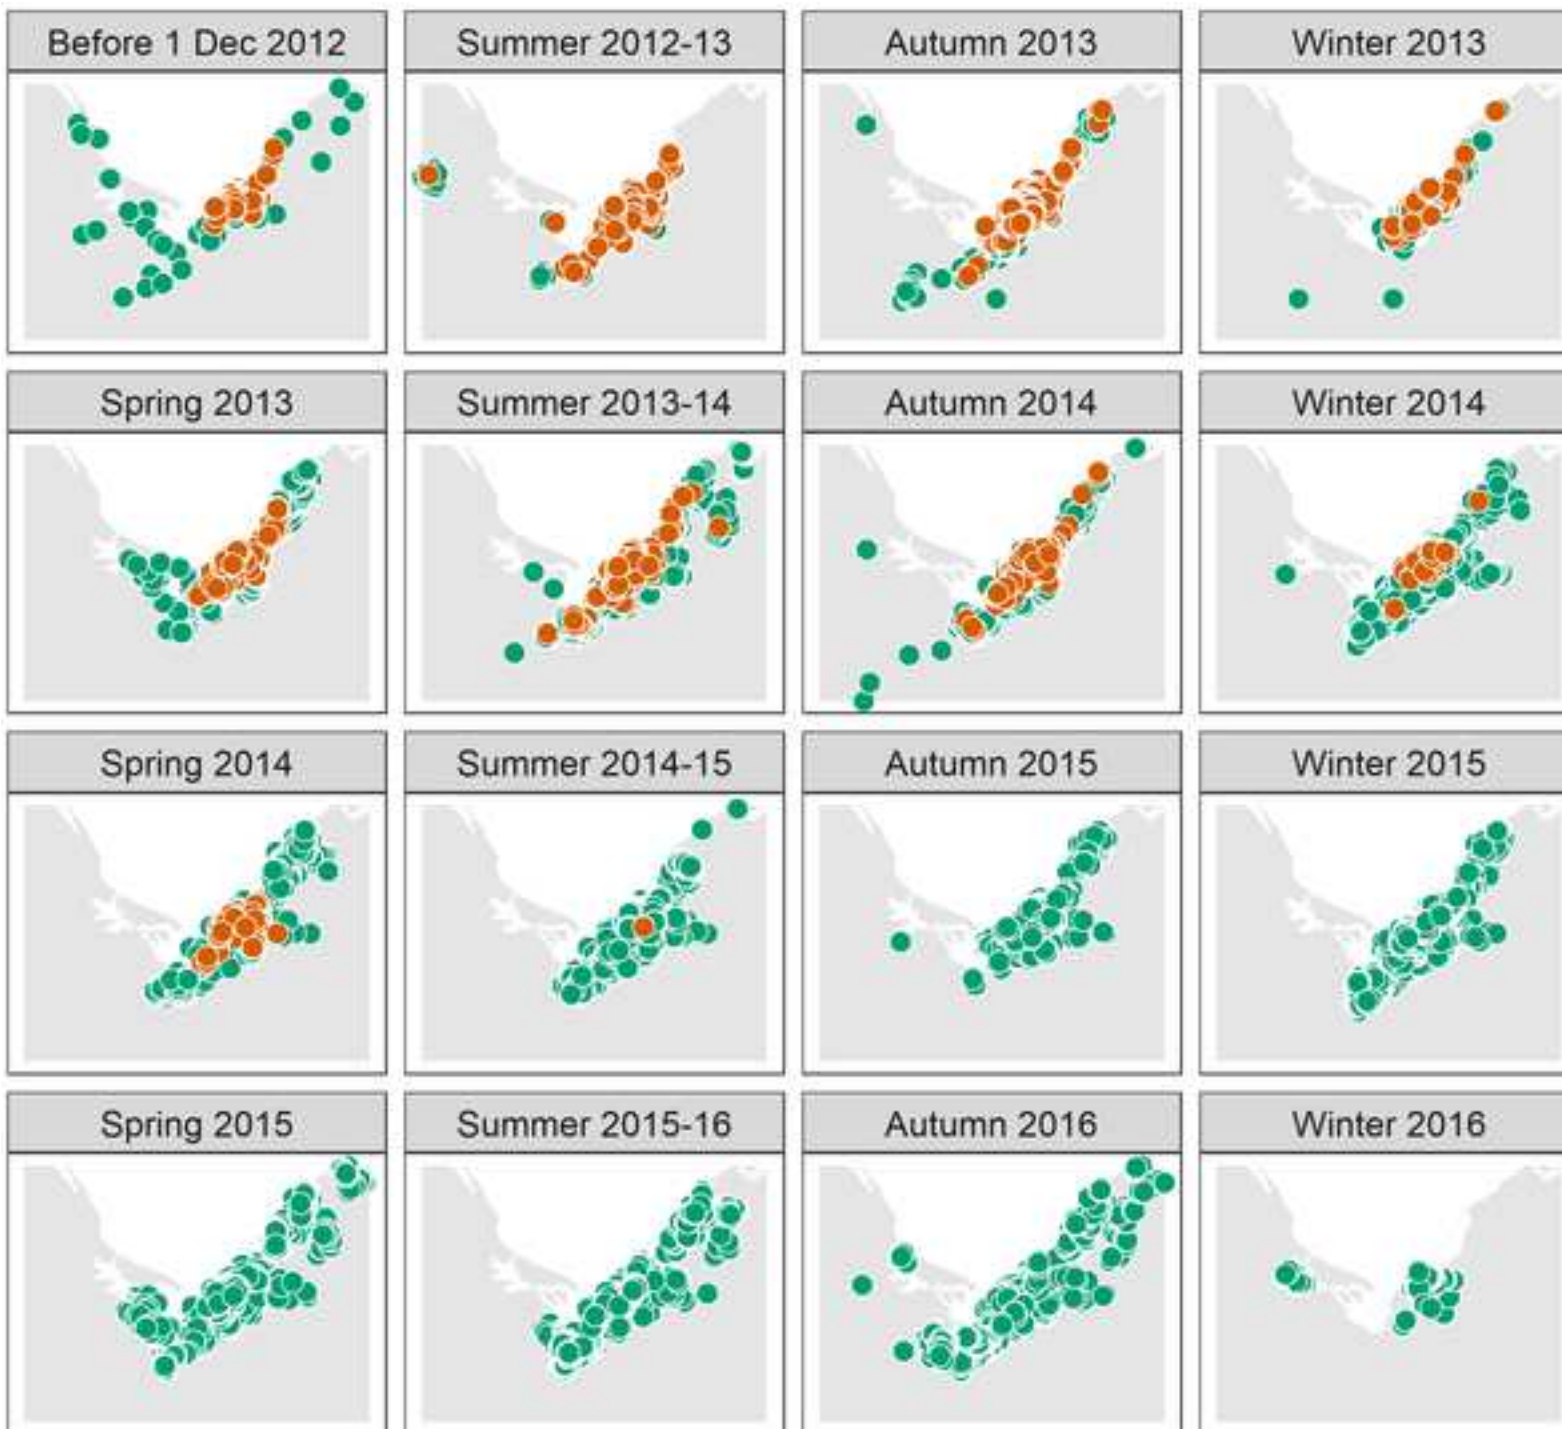

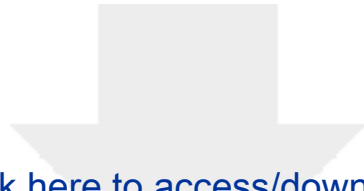

Click here to access/download  
**Supporting Information**  
additional\_information\_1.docx

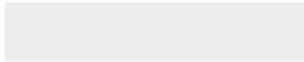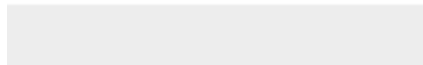





Click here to access/download  
**Supporting Information**  
additional\_information\_2.docx





Click here to access/download  
**Supporting Information**  
additional\_information\_3.docx

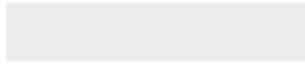

Supplement: pone.0236791.s005.pdf [file pone.0236791.s005.pdf]
